# Supplementary material for: Emergency SARS-CoV-2 variants of concern: rapidly direct RT-qPCR detection without RNA extraction, clinical comparison, cost-effective, and high-throughput
Source: publisher site journal article supplement (doi:10.18632/aging.204095), 2022-06-02
Supplement: Supplementary file [file aging-v14i11-204095-supplementary-material-SD2.pdf]

## SUPPLEMENTARY TABLES

Supplementary Table 2. Primer and probe sequences used in the conventional RT-qPCR and lab-developed RT-qPCR.

| <b>LabTurbo™ AIO COVID-19 RNA Testing Kit</b> |                     |                                                |                   |
|-----------------------------------------------|---------------------|------------------------------------------------|-------------------|
| <b>Primer name</b>                            | <b>Target gene</b>  | <b>Sequence (5'→3')</b>                        | <b>References</b> |
| E_Sarbeco_F                                   |                     | ACAGGTACGTTAATAGTTAATAGCGT                     |                   |
| E_Sarbeco_R                                   | <i>E</i> gene       | ATATTGCAGCAGTACGCACACA                         | [7]               |
| E_Sarbeco_P                                   |                     | /5HEX/ACACTAGCC/ZEN/ATCCTTACTGCGCTTCG/3IABkFQ/ |                   |
| 2019-nCoV_N1-F                                |                     | GACCCCAAATCAGCGAAAT                            |                   |
| 2019-nCoV_N1-R                                | <i>NI</i> gene      | TCTGGTTACTGCCAGTTGAATCTG                       | [7]               |
| 2019-nCoV_N1-P                                |                     | /56-FAM/ACCCCGCAT/ZEN/TACGTTTGGTGGACC/3IABkFQ/ |                   |
| RP-F                                          |                     | AGATTTGGACCTGCGAGCG                            |                   |
| RP-R                                          | <i>RNase P</i> gene | GAGCGGCTGTCTCCACAAGT                           | [7]               |
| RP-P                                          |                     | /5Cy5/TTCTGACCT/TAO/GAAGGCTCTGCGCG/3IAbRQSp/   |                   |
| <b>WHO</b>                                    |                     |                                                |                   |
| <b>Primer name</b>                            | <b>Target gene</b>  | <b>Sequence (5'→3')</b>                        | <b>References</b> |
| RdRP_SARSr-F2                                 |                     | GTGARATGGTCATGTGTGGCGG                         |                   |
| RdRP_SARSr-R1                                 | <i>RdRP</i> gene    | CARATGTTAAASACTATTAGCATA                       | [14]              |
| RdRP_SARSr-P2                                 |                     | FAM-CAGGTGGAACCTCATCAGGAGATGC-BBQ              |                   |
| E_Sarbeco_F                                   |                     | ACAGGTACGTTAATAGTTAATAGCGT                     |                   |
| E_Sarbeco_R                                   | <i>E</i> gene       | ATATTGCAGCAGTACGCACACA                         | [14]              |
| E_Sarbeco_P                                   |                     | /5HEX/ACACTAGCC/ZEN/ATCCTTACTGCGCTTCG/3IABkFQ/ |                   |
| RP-F                                          |                     | AGATTTGGACCTGCGAGCG                            |                   |
| RP-R                                          | <i>RNase P</i> gene | GAGCGGCTGTCTCCACAAGT                           | [7]               |
| RP-P                                          |                     | /5Cy5/TTCTGACCT/TAO/GAAGGCTCTGCGCG/3IAbRQSp/   |                   |

**Supplementary Table 3. Positive and negative agreement of conventional RT-qPCR versus lab-developed direct RT-qPCR used by COVID-19 RNA reagent and WHO.**

|                             | Conventional RT-qPCR |          |             |          | Lab-developed Direct RT-qPCR |          |             |          |
|-----------------------------|----------------------|----------|-------------|----------|------------------------------|----------|-------------|----------|
|                             | COVID-19 RNA kit     |          | WHO         |          | COVID-19 RNA kit             |          | WHO         |          |
|                             | <i>NI</i>            | <i>E</i> | <i>Rdrp</i> | <i>E</i> | <i>NI</i>                    | <i>E</i> | <i>Rdrp</i> | <i>E</i> |
| Total positive ( <i>n</i> ) | 116                  |          | 116         |          | 111                          |          | 111         |          |
| High (<20)                  | 55                   | 48       | 55          | 48       | 46                           | 38       | 43          | 36       |
| Ct value ( <i>n</i> )       | Medium (20–29)       |          | 52          |          | 35                           |          | 37          |          |
| Low (30–35)                 | 9                    | 22       | 8           | 22       | 33                           | 45       | 32          | 42       |
| Total negative ( <i>n</i> ) | 654                  |          | 654         |          | 659                          |          | 659         |          |

**Supplementary Table 4. Cross-reaction of conventional RT-qPCR and lab-developed RT-qPCR with known respiratory viruses in clinical samples/cell supernatants.**

| Viral pathogens             | Convention RT-qPCR | Direct RT-qPCR |
|-----------------------------|--------------------|----------------|
| Influenza A (H1)            | Not detected       | Not detected   |
| Influenza A (H3)            | Not detected       | Not detected   |
| Influenza A (H1N1)          | Not detected       | Not detected   |
| Influenza B                 | Not detected       | Not detected   |
| Rhinovirus/ Enterovirus     | Not detected       | Not detected   |
| Respiratory syncytial virus | Not detected       | Not detected   |
| Parainfluenza 1 virus       | Not detected       | Not detected   |
| Parainfluenza 2 virus       | Not detected       | Not detected   |
| Parainfluenza 3 virus       | Not detected       | Not detected   |
| Adenovirus                  | Not detected       | Not detected   |
| Coronavirus NL96            | Not detected       | Not detected   |
